# Supplementary material for: Is Cognitive Training Effective for Improving Executive Functions in Preschoolers? A Systematic Review and Meta-Analysis
Source: Front Psychol. 2020 Jan 10;10:2812. doi: 10.3389/fpsyg.2019.02812 (PMC6965160; doi:10.3389/fpsyg.2019.02812)
Supplement: Supplementary file 8 [file Data_Sheet_2.XLSX]

## Sheet: DATIFINAL
effectsizeID	studyID	comparison	cite	year	English	Grigia	GCattivo	GSn	GCn	GS_Meta	GSDSeta	GCMeta	GCDSeta	SvAt	GrAt	Abilita	Task	EffectDirection	GrMult	Contr	TrComput	TrIndiv	Near	Nsess	Near_2	Minutes	AddOutco	y	EffectDirection2	v
94	18	1	Capodieci A., Gola M. L., Cornoldi C., Re A. M.	2018	1	0	0	18	16	65.88	3.81	65.88	3.77	1	ADHD	V_WM	BackDig	0	0	0	0	0	1	16	1	960	0	1.17087	1	0.132705
99	18	6	Capodieci A., Gola M. L., Cornoldi C., Re A. M.	2018	1	0	0	18	16	65.88	3.81	65.88	3.77	1	ADHD	ProbBeh	Hyp	1	0	0	0	0	0	16	0	960	1	0.02882	-1	0.112556
102	18	9	Capodieci A., Gola M. L., Cornoldi C., Re A. M.	2018	1	0	0	18	16	65.88	3.81	65.88	3.77	1	ADHD	ProbBeh	Hyp	1	0	0	0	0	0	16	0	960	1	0.177158	-1	0.113006
98	18	5	Capodieci A., Gola M. L., Cornoldi C., Re A. M.	2018	1	0	0	18	16	65.88	3.81	65.88	3.77	1	ADHD	ProbBeh	Inat	1	0	0	0	0	0	16	0	960	1	0.0220098	-1	0.112551
101	18	8	Capodieci A., Gola M. L., Cornoldi C., Re A. M.	2018	1	0	0	18	16	65.88	3.81	65.88	3.77	1	ADHD	ProbBeh	Inat	1	0	0	0	0	0	16	0	960	1	-0.236909	-1	0.113369
96	18	3	Capodieci A., Gola M. L., Cornoldi C., Re A. M.	2018	1	0	0	18	16	65.88	3.81	65.88	3.77	1	ADHD	IC	MF14	1	0	0	0	0	0	16	0	960	0	0.463777	-1	0.115707
95	18	2	Capodieci A., Gola M. L., Cornoldi C., Re A. M.	2018	1	0	0	18	16	65.88	3.81	65.88	3.77	1	ADHD	VS_WM	SelWM	0	0	0	0	0	1	16	1	960	0	0.718508	1	0.120136
97	18	4	Capodieci A., Gola M. L., Cornoldi C., Re A. M.	2018	1	0	0	18	16	65.88	3.81	65.88	3.77	1	ADHD	IC	W_NW	0	0	0	0	0	0	16	0	960	0	0.716649	1	0.120097
100	18	7	Capodieci A., Gola M. L., Cornoldi C., Re A. M.	2018	1	0	0	18	16	65.88	3.81	65.88	3.77	1	ADHD	ProbBeh	WM_IPD	1	0	0	0	0	1	16	1	960	1	0.229878	-1	0.113321
106	19	4	Joekar S., Amiri s., Joekar S., Birashk B., Aghebati A.	2017	1	0	0	15	15	68.84	3.31	68.76	3.4	1	ADHD	ProbBeh	Hyp	1	0	0	0	1	0	11	0	495	1	0.461163	-1	0.129768
107	19	5	Joekar S., Amiri s., Joekar S., Birashk B., Aghebati A.	2017	1	0	0	15	15	68.84	3.31	68.76	3.4	1	ADHD	ProbBeh	Hyp	1	0	0	0	1	0	11	0	495	1	0.441206	-1	0.129468
104	19	2	Joekar S., Amiri s., Joekar S., Birashk B., Aghebati A.	2017	1	0	0	15	15	68.84	3.31	68.76	3.4	1	ADHD	ProbBeh	Inat	1	0	0	0	1	0	11	0	495	1	-0.0827491	-1	0.126338
105	19	3	Joekar S., Amiri s., Joekar S., Birashk B., Aghebati A.	2017	1	0	0	15	15	68.84	3.31	68.76	3.4	1	ADHD	ProbBeh	Inat	1	0	0	0	1	0	11	0	495	1	-0.208596	-1	0.126949
103	19	1	Joekar S., Amiri s., Joekar S., Birashk B., Aghebati A.	2017	1	0	0	15	15	68.84	3.31	68.76	3.4	1	ADHD	IC	Toulouse	1	0	0	0	1	0	11	0	495	0	1.05436	-1	0.144751
66	12	3	Re A. M., Capodieci A., Cornoldi C.	2015	1	0	0	13	13	65.15	4.49	65.61	4.21	0	NA	ProbBeh	Hyp	1	0	0	0	0	0	17	0	1020	1	-0.0358122	-1	0.144308
65	12	2	Re A. M., Capodieci A., Cornoldi C.	2015	1	0	0	13	13	65.15	4.49	65.61	4.21	0	NA	ProbBeh	Inat	1	0	0	0	0	0	17	0	1020	1	-0.625677	-1	0.151811
64	12	1	Re A. M., Capodieci A., Cornoldi C.	2015	1	0	0	13	13	65.15	4.49	65.61	4.21	0	NA	IC	W_NW	0	0	0	0	0	1	17	1	1020	0	0.262735	1	0.14561
136	26	2	Re A. M., Capodieci A., Cornoldi C.	2015	1	0	0	13	13	63.42	4.98	63.03	4.4	1	ADHD	ProbBeh	Hyp	1	0	0	0	0	0	17	0	1020	1	-0.0290891	-1	0.144299
135	26	1	Re A. M., Capodieci A., Cornoldi C.	2015	1	0	0	13	13	63.42	4.98	63.03	4.4	1	ADHD	ProbBeh	Inat	1	0	0	0	0	0	17	0	1020	1	-0.118136	-1	0.144551
134	26	1	Re A. M., Capodieci A., Cornoldi C.	2015	1	0	0	13	13	63.42	4.98	63.03	4.4	1	ADHD	IC	W_NW	0	0	0	0	0	1	17	1	1020	0	0.803886	1	0.156711
144	28	3	Salvaguardia F., Re A. M., Caponi B., Cornoldi C.	2009	0	0	0	18	14	71	NA	71	NA	1	ADHD	VS_WM	DRST	0	0	0	0	0	1	21	1	1260	0	0.612771	1	0.126529
143	28	2	Salvaguardia F., Re A. M., Caponi B., Cornoldi C.	2009	0	0	0	18	14	71	NA	71	NA	1	ADHD	ProbBeh	Hyp	1	0	0	0	0	0	21	0	1260	1	-0.306615	-1	0.122131
142	28	1	Salvaguardia F., Re A. M., Caponi B., Cornoldi C.	2009	0	0	0	18	14	71	NA	71	NA	1	ADHD	ProbBeh	Inat	1	0	0	0	0	0	21	0	1260	1	-0.386489	-1	0.122996
1	1	1	Foy J. G., Mann V. A.	2014	1	0	0	23	28	62.4	2.89	61.9	3.99	1	DemRis	VS_WM	BackCor	0	0	0	1	1	1	25	1	500	0	0.464803	1	0.0788927
2	1	2	Foy J. G., Mann V. A.	2014	1	0	0	23	28	62.4	2.89	61.9	3.99	1	DemRis	V_WM	BackDig	0	0	0	1	1	0	25	1	500	0	0.343506	1	0.0779314
4	1	4	Foy J. G., Mann V. A.	2014	1	0	0	23	28	62.4	2.89	61.9	3.99	1	DemRis	LearnRel	DIB_LK	0	0	0	1	1	0	25	0	500	1	1.19052	1	0.09067
5	1	5	Foy J. G., Mann V. A.	2014	1	0	0	23	28	62.4	2.89	61.9	3.99	1	DemRis	LearnRel	DIB_PA	0	0	0	1	1	0	25	0	500	1	-0.835522	1	0.0836187
3	1	3	Foy J. G., Mann V. A.	2014	1	0	0	23	28	62.4	2.89	61.9	3.99	1	DemRis	IC	HTKS	0	0	0	1	1	0	25	0	500	0	0.288493	1	0.0775906
67	13	1	Mulvey K. L., Taunton S., Pennell A., Brian A.	2018	1	0	0	50	57	61.67	9.71	61.67	9.71	1	DemRis	IC	HTKS	0	0	0	0	0	1	12	1	360	0	0.477283	1	0.0380726
167	34	2	Rojas-Barahona C. A., Förster C. E., Moreno-Ríos S., McClelland M. M.	2015	1	0	1	144	124	NA	NA	NA	NA	1	DemRis	LearnRel	ELS	0	0	0	1	1	0	16	0	480	1	0.679917	1	0.0157868
166	34	1	Rojas-Barahona C. A., Förster C. E., Moreno-Ríos S., McClelland M. M.	2015	1	0	1	144	124	NA	NA	NA	NA	1	DemRis	ALL_WM	WM	0	0	0	1	1	1	16	1	480	0	0.550865	1	0.0154905
115	21	2	Schmitt S. A., McClelland M. M., Tominey S. L., Acock A. C.	2015	1	0	0	126	150	51.08	6.58	52.21	6.51	1	DemRis	Flex	CardSort	0	0	0	0	0	1	16	1	480	0	0.158532	1	0.0145688
116	21	3	Schmitt S. A., McClelland M. M., Tominey S. L., Acock A. C.	2015	1	0	0	126	150	51.08	6.58	52.21	6.51	1	DemRis	BehRel	CBRS	0	0	0	0	0	0	16	0	480	1	-0.047268	1	0.0145273
114	21	1	Schmitt S. A., McClelland M. M., Tominey S. L., Acock A. C.	2015	1	0	0	126	150	51.08	6.58	52.21	6.51	1	DemRis	IC	HTKS	0	0	0	0	0	1	16	1	480	0	0.42581	1	0.0148517
118	21	5	Schmitt S. A., McClelland M. M., Tominey S. L., Acock A. C.	2015	1	0	0	126	150	51.08	6.58	52.21	6.51	1	DemRis	LearnRel	LiterLWI	0	0	0	0	0	0	16	0	480	1	0.13718	1	0.0145574
117	21	4	Schmitt S. A., McClelland M. M., Tominey S. L., Acock A. C.	2015	1	0	0	126	150	51.08	6.58	52.21	6.51	1	DemRis	LearnRel	NumProb	0	0	0	0	0	0	16	0	480	1	-0.000975757	1	0.0145233
120	22	2	Brock L. L., Murrah W. M., Cottone E. A. , Mashburn A. J., Grissmer D.W.	2018	1	0	1	44	43	73.2	7.56	72.48	7.56	0	NA	BehRel	CBRS	0	0	0	0	0	0	73	0	3285	1	-0.302843	1	0.0456999
121	22	3	Brock L. L., Murrah W. M., Cottone E. A. , Mashburn A. J., Grissmer D.W.	2018	1	0	1	44	43	73.2	7.56	72.48	7.56	0	NA	BehRel	CBRS	0	0	0	0	0	0	73	0	3285	1	-0.0310977	1	0.0451784
119	22	1	Brock L. L., Murrah W. M., Cottone E. A. , Mashburn A. J., Grissmer D.W.	2018	1	0	1	44	43	73.2	7.56	72.48	7.56	0	NA	EF	NepsyFac	0	0	0	0	0	1	73	1	3285	0	0.720977	1	0.0481602
123	23	2	Gade M., Zoelch C., Seitz-Stein K.	2017	1	0	1	10	10	62.39	6	62.39	6	0	NA	VS_WM	MatrWM	0	0	0	0	1	1	11	1	158	0	0.225049	1	0.184722
124	23	3	Gade M., Zoelch C., Seitz-Stein K.	2017	1	0	1	10	10	62.39	6	62.39	6	0	NA	VS_WM	ObjSp	0	0	0	0	1	1	11	1	158	0	0.361414	1	0.186721
122	23	1	Gade M., Zoelch C., Seitz-Stein K.	2017	1	0	1	10	10	62.39	6	62.39	6	0	NA	V_WM	WordSp	0	0	0	0	1	0	11	1	158	0	0.230065	1	0.184779
156	30	3	Gade M., Zoelch C., Seitz-Stein K.	2017	1	0	1	15	16	67.19	4.7	67.19	4.7	0	NA	VS_WM	ColorSp	0	0	0	0	1	1	12.5	1	159.5	0	-0.364181	1	0.124655
155	30	2	Gade M., Zoelch C., Seitz-Stein K.	2017	1	0	1	15	16	67.19	4.7	67.19	4.7	0	NA	VS_WM	MatrWM	0	0	0	0	1	1	12.5	1	159.5	0	0.107773	1	0.122703
154	30	1	Gade M., Zoelch C., Seitz-Stein K.	2017	1	0	1	15	16	67.19	4.7	67.19	4.7	0	NA	V_WM	WordSp	0	0	0	0	1	0	12.5	1	159.5	0	0.64281	1	0.12918
159	31	3	Gade M., Zoelch C., Seitz-Stein K.	2017	1	0	1	10	10	72	3.6	72	3.6	0	NA	VS_WM	ColorSp	0	0	0	0	1	1	13.5	1	160.5	0	0.368364	1	0.186848
158	31	2	Gade M., Zoelch C., Seitz-Stein K.	2017	1	0	1	10	10	72	3.6	72	3.6	0	NA	VS_WM	MatrWM	0	0	0	0	1	1	13.5	1	160.5	0	-0.318851	1	0.185997
157	31	1	Gade M., Zoelch C., Seitz-Stein K.	2017	1	0	1	10	10	72	3.6	72	3.6	0	NA	V_WM	WordSp	0	0	0	0	1	0	13.5	1	160.5	0	0.256519	1	0.185101
162	32	3	Gade M., Zoelch C., Seitz-Stein K.	2017	1	0	1	10	10	61.3	3.6	61.3	3.6	0	NA	VS_WM	ColorSp	0	0	0	0	1	1	12	1	180	0	-0.574189	1	0.191698
161	32	2	Gade M., Zoelch C., Seitz-Stein K.	2017	1	0	1	10	10	61.3	3.6	61.3	3.6	0	NA	VS_WM	MatrWM	0	0	0	0	1	1	12	1	180	0	-0.875454	1	0.202616
160	32	1	Gade M., Zoelch C., Seitz-Stein K.	2017	1	0	1	10	10	61.3	3.6	61.3	3.6	0	NA	V_WM	WordSp	0	0	0	0	1	0	12	1	180	0	-0.462794	1	0.18881
127	24	3	Garcia Fernandez D. A., Chavez Valenzuela M. E., Cruz Chavez C., Guedea Delgado J. C., Velazquez Saucedo G., Zubiaur Gonzalez M.	2018	1	0	0	35	31	74.39	6.47	74.39	6.47	0	NA	LearnRel	CUMAN	0	0	0	0	0	0	45	0	675	1	0.163235	1	0.0596085
128	24	4	Garcia Fernandez D. A., Chavez Valenzuela M. E., Cruz Chavez C., Guedea Delgado J. C., Velazquez Saucedo G., Zubiaur Gonzalez M.	2018	1	0	0	35	31	74.39	6.47	74.39	6.47	0	NA	LearnRel	CUMAN	0	0	0	0	0	0	45	0	675	1	0.481516	1	0.0611631
125	24	1	Garcia Fernandez D. A., Chavez Valenzuela M. E., Cruz Chavez C., Guedea Delgado J. C., Velazquez Saucedo G., Zubiaur Gonzalez M.	2018	1	0	0	35	31	74.39	6.47	74.39	6.47	0	NA	Flex	FD_NEP	0	0	0	0	0	1	45	1	675	0	0.844425	1	0.0648086
126	24	2	Garcia Fernandez D. A., Chavez Valenzuela M. E., Cruz Chavez C., Guedea Delgado J. C., Velazquez Saucedo G., Zubiaur Gonzalez M.	2018	1	0	0	35	31	74.39	6.47	74.39	6.47	0	NA	IC	INI_NEP	0	0	0	0	0	1	45	1	675	0	0.254745	1	0.0598983
129	24	5	Garcia Fernandez D. A., Chavez Valenzuela M. E., Cruz Chavez C., Guedea Delgado J. C., Velazquez Saucedo G., Zubiaur Gonzalez M.	2018	1	0	0	35	31	74.39	6.47	74.39	6.47	0	NA	LearnRel	TEMA_3	0	0	0	0	0	0	45	0	675	1	0.211855	1	0.0597466
87	16	3	Howard S. J., Powell T., Vasseleu E., Johnstone S., Melhuish E.	2017	1	0	0	22	18	52.79	7.91	52.79	7.91	0	NA	Flex	CardSort	0	1	1	0	1	1	10	1	150	0	0.414921	1	0.0991883
90	16	6	Howard S. J., Powell T., Vasseleu E., Johnstone S., Melhuish E.	2017	1	0	0	25	18	52.79	7.91	52.79	7.91	0	NA	Flex	CardSort	0	1	2	0	0	1	10	1	150	0	0.850631	1	0.100484
86	16	2	Howard S. J., Powell T., Vasseleu E., Johnstone S., Melhuish E.	2017	1	0	0	22	18	52.79	7.91	52.79	7.91	0	NA	IC	GoNoGo	1	1	1	0	1	1	10	1	150	0	-0.0463887	-1	0.0970632
89	16	5	Howard S. J., Powell T., Vasseleu E., Johnstone S., Melhuish E.	2017	1	0	0	25	18	52.79	7.91	52.79	7.91	0	NA	IC	GoNoGo	1	1	2	0	0	1	10	1	150	0	-0.185262	-1	0.0924696
85	16	1	Howard S. J., Powell T., Vasseleu E., Johnstone S., Melhuish E.	2017	1	0	0	22	18	52.79	7.91	52.79	7.91	0	NA	VS_WM	MrAnt	0	1	1	0	1	1	10	1	150	0	0.205424	1	0.0975638
88	16	4	Howard S. J., Powell T., Vasseleu E., Johnstone S., Melhuish E.	2017	1	0	0	25	18	52.79	7.91	52.79	7.91	0	NA	VS_WM	MrAnt	0	1	2	0	0	1	10	1	150	0	-0.0381882	1	0.0920875
48	7	2	Liu Q., Zhu X., Ziegler A., Shi J.	2015	1	0	1	16	20	59.03	3.23	58.19	2.51	0	NA	V_WM	BackDig	0	0	0	1	1	0	12	0	180	0	0.0601893	1	0.107606
49	7	3	Liu Q., Zhu X., Ziegler A., Shi J.	2015	1	0	1	16	20	59.03	3.23	58.19	2.51	0	NA	FluidInt	Raven	0	0	0	1	1	0	12	0	180	0	0.632092	1	0.113105
47	7	1	Liu Q., Zhu X., Ziegler A., Shi J.	2015	1	0	1	16	20	59.03	3.23	58.19	2.51	0	NA	IC	StroopA	0	0	0	1	1	1	12	1	180	0	0.128567	1	0.107785
71	14	4	Nutley S. B., Soderqvist S., Bryde S., Thorell L. B., Humphreys K., Klingberg T.	2011	1	0	0	24	25	51.2	3.03	51.2	3.03	0	NA	FluidInt	LeiterPS	0	1	1	1	1	0	25	0	375	0	-0.118202	1	0.0792099
69	14	2	Nutley S. B., Soderqvist S., Bryde S., Thorell L. B., Humphreys K., Klingberg T.	2011	1	0	0	24	25	51.2	3.03	51.2	3.03	0	NA	VS_WM	OddOne	0	1	1	1	1	1	25	1	375	0	0.889163	1	0.0871348
73	14	6	Nutley S. B., Soderqvist S., Bryde S., Thorell L. B., Humphreys K., Klingberg T.	2011	1	0	0	24	25	51.2	3.03	51.2	3.03	0	NA	VS_WM	OddOne	0	1	2	1	1	0	25	1	375	0	0.552989	1	0.0821877
77	14	10	Nutley S. B., Soderqvist S., Bryde S., Thorell L. B., Humphreys K., Klingberg T.	2011	1	0	0	27	25	51.2	3.03	51.2	3.03	0	NA	VS_WM	OddOne	0	1	3	1	1	1	25	1	375	0	0.774741	1	0.0805032
68	14	1	Nutley S. B., Soderqvist S., Bryde S., Thorell L. B., Humphreys K., Klingberg T.	2011	1	0	0	24	25	51.2	3.03	51.2	3.03	0	NA	FluidInt	RavBlock	0	1	1	1	1	0	25	0	375	0	-0.163993	1	0.0793418
72	14	5	Nutley S. B., Soderqvist S., Bryde S., Thorell L. B., Humphreys K., Klingberg T.	2011	1	0	0	24	25	51.2	3.03	51.2	3.03	0	NA	FluidInt	RavBlock	0	1	2	1	1	1	25	1	375	0	0.302357	1	0.0800002
76	14	9	Nutley S. B., Soderqvist S., Bryde S., Thorell L. B., Humphreys K., Klingberg T.	2011	1	0	0	27	25	51.2	3.03	51.2	3.03	0	NA	FluidInt	RavBlock	0	1	3	1	1	1	25	1	375	0	0.350351	1	0.0759121
75	14	8	Nutley S. B., Soderqvist S., Bryde S., Thorell L. B., Humphreys K., Klingberg T.	2011	1	0	0	24	25	51.2	3.03	51.2	3.03	0	NA	VS_WM	Wmgrid	0	1	2	1	1	1	25	1	375	0	0.295197	1	0.0799566
70	14	3	Nutley S. B., Soderqvist S., Bryde S., Thorell L. B., Humphreys K., Klingberg T.	2011	1	0	0	24	25	51.2	3.03	51.2	3.03	0	NA	V_WM	WordSp	0	1	1	1	1	0	25	1	375	0	0.216155	1	0.0795441
74	14	7	Nutley S. B., Soderqvist S., Bryde S., Thorell L. B., Humphreys K., Klingberg T.	2011	1	0	0	24	25	51.2	3.03	51.2	3.03	0	NA	V_WM	WordSp	0	1	2	1	1	0	25	1	375	0	-0.0677318	1	0.0791142
78	14	11	Nutley S. B., Soderqvist S., Bryde S., Thorell L. B., Humphreys K., Klingberg T.	2011	1	0	0	27	25	51.2	3.03	51.2	3.03	0	NA	V_WM	WordSp	0	1	3	1	1	0	25	1	375	0	-0.0189519	1	0.0747353
8	2	3	Passolunghi M. C., Costa H. M.	2016	1	0	0	15	18	65.8	2.1	64.4	3.2	0	NA	LearnRel	Num	0	2	1	0	0	0	10	0	600	1	0.38991	1	0.118636
11	2	6	Passolunghi M. C., Costa H. M.	2016	1	0	1	15	15	65.8	2.1	64.67	2.9	0	NA	LearnRel	Num	0	2	2	0	0	0	10	0	600	1	-0.495685	1	0.130319
9	2	4	Passolunghi M. C., Costa H. M.	2016	1	0	1	15	15	65.8	2.1	64.67	2.9	0	NA	V_WM	Vdual	0	2	2	0	0	1	10	1	600	0	0.896019	1	0.139604
7	2	2	Passolunghi M. C., Costa H. M.	2016	1	0	0	15	18	65.8	2.1	64.4	3.2	0	NA	VS_WM	VSDual	0	2	1	0	0	1	10	1	600	0	0.989887	1	0.131179
10	2	5	Passolunghi M. C., Costa H. M.	2016	1	0	1	15	15	65.8	2.1	64.67	2.9	0	NA	VS_WM	VSDual	0	2	2	0	0	1	10	1	600	0	0.466287	1	0.129847
6	2	1	Passolunghi M. C., Costa H. M.	2016	1	0	0	15	18	65.8	2.1	64.4	3.2	0	NA	V_WM	Wmgrid	0	2	1	0	0	1	10	1	600	0	0.967787	1	0.130524
84	15	6	Pellizzoni, S., Apuzzo G. M., De Vita C., Agostini T., Passolunghi M. C.	2019	1	0	0	55	51	65.8	2.1	64.4	3.2	0	NA	V_WM	BackDig	0	0	0	0	0	1	20	1	800	0	0	1	0.0372453
82	15	4	Pellizzoni, S., Apuzzo G. M., De Vita C., Agostini T., Passolunghi M. C.	2019	1	0	0	55	51	65.8	2.1	64.4	3.2	0	NA	IC	Circle	0	0	0	0	0	1	20	1	800	0	0.496386	1	0.0384075
79	15	1	Pellizzoni, S., Apuzzo G. M., De Vita C., Agostini T., Passolunghi M. C.	2019	1	0	0	55	51	65.8	2.1	64.4	3.2	0	NA	IC	Delay	0	0	0	0	0	1	20	1	800	0	0.557251	1	0.03871
81	15	3	Pellizzoni, S., Apuzzo G. M., De Vita C., Agostini T., Passolunghi M. C.	2019	1	0	0	55	51	65.8	2.1	64.4	3.2	0	NA	IC	Gif_wrE	1	0	0	0	0	1	20	1	800	0	0.202829	-1	0.0374393
80	15	2	Pellizzoni, S., Apuzzo G. M., De Vita C., Agostini T., Passolunghi M. C.	2019	1	0	0	55	51	65.8	2.1	64.4	3.2	0	NA	IC	Gif_wrT	0	0	0	0	0	1	20	1	800	0	0.326779	1	0.037749
83	15	5	Pellizzoni, S., Apuzzo G. M., De Vita C., Agostini T., Passolunghi M. C.	2019	1	0	0	55	51	65.8	2.1	64.4	3.2	0	NA	IC	StroopA	0	0	0	0	0	1	20	1	800	0	0.449151	1	0.0381969
45	6	1	Peng J., Mo L., Huang P., Zhou Y.	2017	1	0	1	23	25	NA	NA	NA	NA	0	NA	FluidInt	Raven	0	2	1	1	1	0	14	0	210	0	1.14447	1	0.0944076
46	6	2	Peng J., Mo L., Huang P., Zhou Y.	2017	1	0	0	23	26	NA	NA	NA	NA	0	NA	FluidInt	Raven	0	2	2	1	1	0	14	0	210	0	0.743375	1	0.0849706
55	9	2	Pozuelos J. P., Combita L. M., Abundis A., Paz-Alonso P. M., Conejero Á., Guerra S., Rueda M. R.	2017	1	0	1	33	33	63.4	7.84	63.7	6.56	0	NA	V_WM	BackDig	0	1	1	1	1	0	NA	0	NA	0	0.163784	1	0.0593916
58	9	5	Pozuelos J. P., Combita L. M., Abundis A., Paz-Alonso P. M., Conejero Á., Guerra S., Rueda M. R.	2017	1	0	1	31	33	63.5	7.15	63.7	6.56	0	NA	V_WM	BackDig	0	1	2	1	1	0	10	0	450	0	1.73e-16	1	0.0610506
56	9	3	Pozuelos J. P., Combita L. M., Abundis A., Paz-Alonso P. M., Conejero Á., Guerra S., Rueda M. R.	2017	1	0	1	33	33	63.4	7.84	63.7	6.56	0	NA	FluidInt	Raven	0	1	1	1	1	0	NA	0	NA	0	0.610448	1	0.0620115
59	9	6	Pozuelos J. P., Combita L. M., Abundis A., Paz-Alonso P. M., Conejero Á., Guerra S., Rueda M. R.	2017	1	0	1	31	33	63.5	7.15	63.7	6.56	0	NA	FluidInt	Raven	0	1	2	1	1	0	10	0	450	0	0.469152	1	0.0627702
54	9	1	Pozuelos J. P., Combita L. M., Abundis A., Paz-Alonso P. M., Conejero Á., Guerra S., Rueda M. R.	2017	1	0	1	33	33	63.4	7.84	63.7	6.56	0	NA	IC	Simon	1	1	1	1	1	1	10	1	450	0	0.172749	-1	0.0594145
57	9	4	Pozuelos J. P., Combita L. M., Abundis A., Paz-Alonso P. M., Conejero Á., Guerra S., Rueda M. R.	2017	1	0	1	31	33	63.5	7.15	63.7	6.56	0	NA	IC	Simon	1	1	2	1	1	1	10	1	450	0	0.317677	-1	0.0618391
109	20	2	Qiong Zhang, Cuiping Wang, Qianwen Zhao, Ling Yang, Martin Buschkuehl, Susanne M. Jaeggi	2016	1	0	0	20	22	73.5	2.1	73.5	2.1	0	NA	IC	AXCPT	0	1	1	1	1	0	20	0	300	0	-0.126617	1	0.0920773
112	20	5	Qiong Zhang, Cuiping Wang, Qianwen Zhao, Ling Yang, Martin Buschkuehl, Susanne M. Jaeggi	2016	1	0	0	21	22	73.5	2.1	73.5	2.1	0	NA	IC	AXCPT	0	1	2	1	1	1	20	1	300	0	-0.455741	1	0.0920942
108	20	1	Qiong Zhang, Cuiping Wang, Qianwen Zhao, Ling Yang, Martin Buschkuehl, Susanne M. Jaeggi	2016	1	0	0	20	22	73.5	2.1	73.5	2.1	0	NA	V_WM	BackDig	0	1	1	1	1	0	20	0	300	0	-0.215059	1	0.0924371
111	20	4	Qiong Zhang, Cuiping Wang, Qianwen Zhao, Ling Yang, Martin Buschkuehl, Susanne M. Jaeggi	2016	1	0	0	21	22	73.5	2.1	73.5	2.1	0	NA	V_WM	BackDig	0	1	2	1	1	0	20	0	300	0	0.198264	1	0.0901362
110	20	3	Qiong Zhang, Cuiping Wang, Qianwen Zhao, Ling Yang, Martin Buschkuehl, Susanne M. Jaeggi	2016	1	0	0	20	22	73.5	2.1	73.5	2.1	0	NA	FluidInt	Raven	0	1	1	1	1	0	20	0	300	0	0.19177	1	0.0923243
113	20	6	Qiong Zhang, Cuiping Wang, Qianwen Zhao, Ling Yang, Martin Buschkuehl, Susanne M. Jaeggi	2016	1	0	0	21	22	73.5	2.1	73.5	2.1	0	NA	FluidInt	Raven	0	1	2	1	1	0	20	0	300	0	-0.0565755	1	0.0897163
60	10	1	Ríos S. G., Bolivar H., García K., Montoya C.	2014	0	0	0	8	8	63.71	5.75	63.71	5.75	0	NA	Plan	TdM	0	0	0	1	1	1	12	1	240	0	0.0612226	1	0.223588
93	17	3	Röthlisberger M., Neuenschwander R., Cimeli P., Michel E., Roebers C. M.	2012	1	0	0	33	38	60.2	3.7	60.7	3.6	0	NA	VS_WM	CompleSp	0	0	0	0	0	1	30	1	900	0	0.747214	1	0.0593221
91	17	1	Röthlisberger M., Neuenschwander R., Cimeli P., Michel E., Roebers C. M.	2012	1	0	0	33	38	60.2	3.7	60.7	3.6	0	NA	IC	Flanker	0	0	0	0	0	1	30	1	900	0	0.0604268	1	0.055416
92	17	2	Röthlisberger M., Neuenschwander R., Cimeli P., Michel E., Roebers C. M.	2012	1	0	0	33	38	60.2	3.7	60.7	3.6	0	NA	Flex	Flanker	0	0	0	0	0	1	30	1	900	0	0.513329	1	0.0572459
165	33	3	Röthlisberger M., Neuenschwander R., Cimeli P., Michel E., Roebers C. M.	2012	1	0	0	30	34	73	4.2	72.8	3.5	0	NA	VS_WM	CompleSp	0	0	0	0	0	1	30	1	900	0	0.291111	1	0.0618923
163	33	1	Röthlisberger M., Neuenschwander R., Cimeli P., Michel E., Roebers C. M.	2012	1	0	0	30	34	73	4.2	72.8	3.5	0	NA	IC	Flanker	0	0	0	0	0	1	30	1	900	0	0.227391	1	0.0616341
164	33	2	Röthlisberger M., Neuenschwander R., Cimeli P., Michel E., Roebers C. M.	2012	1	0	0	30	34	73	4.2	72.8	3.5	0	NA	Flex	Flanker	0	0	0	0	0	1	30	1	900	0	0.33529	1	0.0621085
137	27	1	Rueda M. R., Checa P., Còmbita L. M.	2012	1	0	0	19	18	65.1	3.73	64.3	2.56	0	NA	IC	ANT_com	1	0	0	1	1	1	10	1	450	0	-0.153457	-1	0.103886
138	27	2	Rueda M. R., Checa P., Còmbita L. M.	2012	1	0	0	19	18	65.1	3.73	64.3	2.56	0	NA	IC	ANT_exe	1	0	0	1	1	1	10	1	450	0	0.0035538	-1	0.103568
139	27	3	Rueda M. R., Checa P., Còmbita L. M.	2012	1	0	0	19	18	65.1	3.73	64.3	2.56	0	NA	IC	DoG	0	0	0	1	1	1	10	1	450	0	0.459315	1	0.106419
141	27	5	Rueda M. R., Checa P., Còmbita L. M.	2012	1	0	0	19	18	65.1	3.73	64.3	2.56	0	NA	BehRel	Gambling	0	0	0	1	1	0	10	0	450	0	0.277992	1	0.104612
140	27	4	Rueda M. R., Checa P., Còmbita L. M.	2012	1	0	0	19	18	65.1	3.73	64.3	2.56	0	NA	FluidInt	Raven	0	0	0	1	1	0	10	0	450	0	0.0968913	1	0.103694
51	8	2	Schmitt S. A., Korucu I., Napoli A. R., Bryant L. M., Purpura D. J.	2018	1	0	0	24	35	55.2	7.17	55.2	7.17	0	NA	Flex	CardSort	0	0	0	0	1	1	14	1	280	0	-0.018759	1	0.0683968
52	8	3	Schmitt S. A., Korucu I., Napoli A. R., Bryant L. M., Purpura D. J.	2018	1	0	0	24	35	55.2	7.17	55.2	7.17	0	NA	IC	HTKS	0	0	0	0	1	1	14	1	280	0	0.153327	1	0.0685931
53	8	4	Schmitt S. A., Korucu I., Napoli A. R., Bryant L. M., Purpura D. J.	2018	1	0	0	24	35	55.2	7.17	55.2	7.17	0	NA	LearnRel	PENS	0	0	0	0	1	0	14	0	280	1	0.124918	1	0.0685261
50	8	1	Schmitt S. A., Korucu I., Napoli A. R., Bryant L. M., Purpura D. J.	2018	1	0	0	24	35	55.2	7.17	55.2	7.17	0	NA	IC	StroopA	0	0	0	0	1	1	14	1	280	0	0.290622	1	0.0691096
16	3	5	Thorell L .B., Lindqvist S., Bergman Nutley S., Bohlin G., Klingberg T.	2009	1	0	1	17	14	54	NA	58	NA	0	NA	FluidInt	BlockDes	0	3	1	1	1	0	25	0	375	0	-0.0257398	1	0.123556
21	3	10	Thorell L .B., Lindqvist S., Bergman Nutley S., Bohlin G., Klingberg T.	2009	1	0	0	17	16	54	NA	60	NA	0	NA	FluidInt	BlockDes	0	3	2	1	1	0	25	0	375	0	0.33163	1	0.117144
26	3	15	Thorell L .B., Lindqvist S., Bergman Nutley S., Bohlin G., Klingberg T.	2009	1	0	1	18	14	54	NA	58	NA	0	NA	FluidInt	BlockDes	0	3	3	1	1	0	25	0	375	0	-0.0602646	1	0.120719
31	3	20	Thorell L .B., Lindqvist S., Bergman Nutley S., Bohlin G., Klingberg T.	2009	1	0	0	18	16	54	NA	60	NA	0	NA	FluidInt	BlockDes	0	3	4	1	1	0	25	0	375	0	0.382469	1	0.114695
12	3	1	Thorell L .B., Lindqvist S., Bergman Nutley S., Bohlin G., Klingberg T.	2009	1	0	1	17	14	54	NA	58	NA	0	NA	VS_WM	BoardSp	0	3	1	1	1	1	25	1	375	0	0.442194	1	0.126699
17	3	6	Thorell L .B., Lindqvist S., Bergman Nutley S., Bohlin G., Klingberg T.	2009	1	0	0	17	16	54	NA	60	NA	0	NA	VS_WM	BoardSp	0	3	2	1	1	1	25	1	375	0	0.699423	1	0.122889
22	3	11	Thorell L .B., Lindqvist S., Bergman Nutley S., Bohlin G., Klingberg T.	2009	1	0	1	18	14	54	NA	58	NA	0	NA	VS_WM	BoardSp	0	3	3	1	1	0	25	0	375	0	-0.671329	1	0.127704
27	3	16	Thorell L .B., Lindqvist S., Bergman Nutley S., Bohlin G., Klingberg T.	2009	1	0	0	18	16	54	NA	60	NA	0	NA	VS_WM	BoardSp	0	3	4	1	1	0	25	0	375	0	-0.413738	1	0.115061
15	3	4	Thorell L .B., Lindqvist S., Bergman Nutley S., Bohlin G., Klingberg T.	2009	1	0	1	17	14	54	NA	58	NA	0	NA	IC	GoNoGo	1	3	1	1	1	0	25	0	375	0	0.0358232	-1	0.123566
20	3	9	Thorell L .B., Lindqvist S., Bergman Nutley S., Bohlin G., Klingberg T.	2009	1	0	0	17	16	54	NA	60	NA	0	NA	IC	GoNoGo	1	3	2	1	1	0	25	0	375	0	-0.0218846	-1	0.115485
25	3	14	Thorell L .B., Lindqvist S., Bergman Nutley S., Bohlin G., Klingberg T.	2009	1	0	1	18	14	54	NA	58	NA	0	NA	IC	GoNoGo	1	3	3	1	1	1	25	1	375	0	-0.194817	-1	0.121255
30	3	19	Thorell L .B., Lindqvist S., Bergman Nutley S., Bohlin G., Klingberg T.	2009	1	0	0	18	16	54	NA	60	NA	0	NA	IC	GoNoGo	1	3	4	1	1	1	25	1	375	0	-0.267168	-1	0.113594
14	3	3	Thorell L .B., Lindqvist S., Bergman Nutley S., Bohlin G., Klingberg T.	2009	1	0	1	17	14	54	NA	58	NA	0	NA	IC	StroopE	1	3	1	1	1	0	25	0	375	0	0.244282	-1	0.124507
19	3	8	Thorell L .B., Lindqvist S., Bergman Nutley S., Bohlin G., Klingberg T.	2009	1	0	0	17	16	54	NA	60	NA	0	NA	IC	StroopE	1	3	2	1	1	0	25	0	375	0	0.341631	-1	0.117246
24	3	13	Thorell L .B., Lindqvist S., Bergman Nutley S., Bohlin G., Klingberg T.	2009	1	0	1	18	14	54	NA	58	NA	0	NA	IC	StroopE	1	3	3	1	1	1	25	1	375	0	0.208372	-1	0.121341
29	3	18	Thorell L .B., Lindqvist S., Bergman Nutley S., Bohlin G., Klingberg T.	2009	1	0	0	18	16	54	NA	60	NA	0	NA	IC	StroopE	1	3	4	1	1	1	25	1	375	0	0.267888	-1	0.113599
13	3	2	Thorell L .B., Lindqvist S., Bergman Nutley S., Bohlin G., Klingberg T.	2009	1	0	1	17	14	54	NA	58	NA	0	NA	V_WM	WordSp	0	3	1	1	1	0	25	0	375	0	1.10399	1	0.143203
18	3	7	Thorell L .B., Lindqvist S., Bergman Nutley S., Bohlin G., Klingberg T.	2009	1	0	0	17	16	54	NA	60	NA	0	NA	V_WM	WordSp	0	3	2	1	1	0	25	1	375	0	1.06957	1	0.13281
23	3	12	Thorell L .B., Lindqvist S., Bergman Nutley S., Bohlin G., Klingberg T.	2009	1	0	1	18	14	54	NA	58	NA	0	NA	V_WM	WordSp	0	3	3	1	1	0	25	0	375	0	0.177818	1	0.121156
28	3	17	Thorell L .B., Lindqvist S., Bergman Nutley S., Bohlin G., Klingberg T.	2009	1	0	0	18	16	54	NA	60	NA	0	NA	V_WM	WordSp	0	3	4	1	1	0	25	0	375	0	0.177863	1	0.113009
61	11	1	Tominey S. L., McClelland, M.M.	2011	1	0	0	28	37	54.1	3.2	54.9	3.9	0	NA	IC	HTKS	0	0	0	0	0	1	16	1	480	0	0.152969	1	0.0614305
62	11	2	Tominey S. L., McClelland, M.M.	2011	1	0	0	28	37	54.1	3.2	54.9	3.9	0	NA	LearnRel	Liter	0	0	0	0	0	0	16	0	480	1	0.424082	1	0.0626339
63	11	3	Tominey S. L., McClelland, M.M.	2011	1	0	0	28	37	54.1	3.2	54.9	3.9	0	NA	LearnRel	Num	0	0	0	0	0	0	16	0	480	1	0.0218918	1	0.0612542
39	4	8	Traverso L., Viterbori P., Usai M. C.	2015	1	0	0	43	32	68.7	3.5	68.6	3.6	0	NA	V_WM	BackDig	0	0	0	0	0	0	12	1	360	0	0.425567	1	0.0545952
34	4	3	Traverso L., Viterbori P., Usai M. C.	2015	1	0	0	43	32	68.7	3.5	68.6	3.6	0	NA	IC	Circle	0	0	0	0	0	1	12	1	360	0	0.346392	1	0.0541877
32	4	1	Traverso L., Viterbori P., Usai M. C.	2015	1	0	0	43	32	68.7	3.5	68.6	3.6	0	NA	IC	Delay	0	0	0	0	0	1	12	1	360	0	0.692784	1	0.0565874
38	4	7	Traverso L., Viterbori P., Usai M. C.	2015	1	0	0	43	32	68.7	3.5	68.6	3.6	0	NA	IC	Dots	0	0	0	0	0	1	12	1	360	0	0.524536	1	0.055222
36	4	5	Traverso L., Viterbori P., Usai M. C.	2015	1	0	0	43	32	68.7	3.5	68.6	3.6	0	NA	IC	Flanker	0	0	0	0	0	1	12	1	360	0	0.277113	1	0.0538997
33	4	2	Traverso L., Viterbori P., Usai M. C.	2015	1	0	0	43	32	68.7	3.5	68.6	3.6	0	NA	IC	Gift_wr	1	0	0	0	0	1	12	1	360	0	0.435464	-1	0.054652
37	4	6	Traverso L., Viterbori P., Usai M. C.	2015	1	0	0	43	32	68.7	3.5	68.6	3.6	0	NA	IC	GoNoGo	0	0	0	0	0	1	12	1	360	0	-0.0197938	1	0.0533904
41	4	10	Traverso L., Viterbori P., Usai M. C.	2015	1	0	0	43	32	68.7	3.5	68.6	3.6	0	NA	VS_WM	KeepTra	0	0	0	0	0	1	12	1	360	0	0.643299	1	0.0561467
35	4	4	Traverso L., Viterbori P., Usai M. C.	2015	1	0	0	43	32	68.7	3.5	68.6	3.6	0	NA	IC	Match	1	0	0	0	0	1	12	1	360	0	0.445361	-1	0.0547101
40	4	9	Traverso L., Viterbori P., Usai M. C.	2015	1	0	0	43	32	68.7	3.5	68.6	3.6	0	NA	VS_WM	MrCucu	0	0	0	0	0	1	12	1	360	0	0.267216	1	0.0538638
151	29	8	Volckaert A. M. S., Noël M-P.	2015	1	0	1	24	23	60.32	4.76	60.32	4.76	0	NA	ProbBeh	Conduct	1	0	0	0	0	0	16	0	720	1	-0.164292	-1	0.082602
149	29	6	Volckaert A. M. S., Noël M-P.	2015	1	0	1	24	23	60.32	4.76	60.32	4.76	0	NA	ProbBeh	Hyp	1	0	0	0	0	0	16	0	720	1	0.402013	-1	0.0840341
153	29	10	Volckaert A. M. S., Noël M-P.	2015	1	0	1	24	23	60.32	4.76	60.32	4.76	0	NA	ProbBeh	Hyp	1	0	0	0	0	0	16	0	720	1	-0.0531502	-1	0.0823449
145	29	1	Volckaert A. M. S., Noël M-P.	2015	1	0	1	24	23	60.32	4.76	60.32	4.76	0	NA	IC	IC_Fac	0	0	0	0	0	1	16	1	720	0	0.463165	1	0.084597
150	29	7	Volckaert A. M. S., Noël M-P.	2015	1	0	1	24	23	60.32	4.76	60.32	4.76	0	NA	ProbBeh	Impul	1	0	0	0	0	0	16	0	720	1	0.35112	-1	0.0836264
148	29	5	Volckaert A. M. S., Noël M-P.	2015	1	0	1	24	23	60.32	4.76	60.32	4.76	0	NA	ProbBeh	Inat	1	0	0	0	0	0	16	0	720	1	0.20542	-1	0.0827637
152	29	9	Volckaert A. M. S., Noël M-P.	2015	1	0	1	24	23	60.32	4.76	60.32	4.76	0	NA	ProbBeh	Inat	1	0	0	0	0	0	16	0	720	1	0.505664	-1	0.085035
147	29	4	Volckaert A. M. S., Noël M-P.	2015	1	0	1	24	23	60.32	4.76	60.32	4.76	0	NA	Flex	Traffic light, Monster Stroop, HTKS	0	0	0	0	0	0	16	0	720	0	0.361957	1	0.0837086
146	29	3	Volckaert A. M. S., Noël M-P.	2015	1	0	1	24	23	60.32	4.76	60.32	4.76	0	NA	VS_WM	WM_Fac	0	0	0	0	0	0	16	0	720	0	0.732735	1	0.0880265
130	25	1	Lopez M. R.	2018	0	1	1	66	50	NA	NA	NA	NA	0	NA	BehRel	Brief	1	1	1	0	0	0	21	0	630	1	1.43436	-1	0.0435576
132	25	3	Lopez M. R.	2018	0	1	1	69	50	NA	NA	NA	NA	0	NA	BehRel	Brief	1	1	2	0	0	0	21	0	630	1	1.20612	-1	0.0401633
131	25	2	Lopez M. R.	2018	0	1	1	66	50	NA	NA	NA	NA	0	NA	IC	Luria	0	1	1	0	0	1	21	1	630	0	1.65199	1	0.0464527
133	25	4	Lopez M. R.	2018	0	1	1	69	50	NA	NA	NA	NA	0	NA	IC	Luria	0	1	2	0	0	1	21	1	630	0	1.6588	1	0.0456124
42	5	1	Sivó Romero, Pilar	2016	0	1	0	49	48	58	6.49	59	6.48	0	NA	V_WM	BackDig	0	0	0	0	0	1	117	1	3185	0	1.13494	1	0.0472309
43	5	2	Sivó Romero, Pilar	2016	0	1	0	49	48	58	6.49	59	6.48	0	NA	IC	Shape2	0	0	0	0	0	0	117	0	3185	0	-0.224459	1	0.0408509
44	5	3	Sivó Romero, Pilar	2016	0	1	0	49	48	58	6.49	59	6.48	0	NA	Flex	Shape3	0	0	0	0	0	0	117	0	3185	0	0.149136	1	0.0407058
